# Supplementary material for: Role of astroglia in Down’s syndrome revealed by patient-derived human-induced pluripotent stem cells
Source: PubMed Central journal article supplement — Nat Commun. 2014 Jul 18;5:4430. doi: 10.1038/ncomms5430 (PMC4109022; doi:10.1038/ncomms5430), 2014-07-18
Supplement: ncomms5430-s1.pdf [file ncomms5430-s1.pdf]

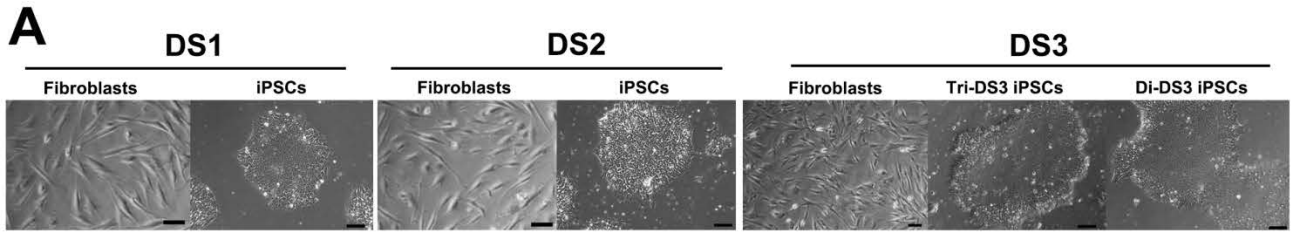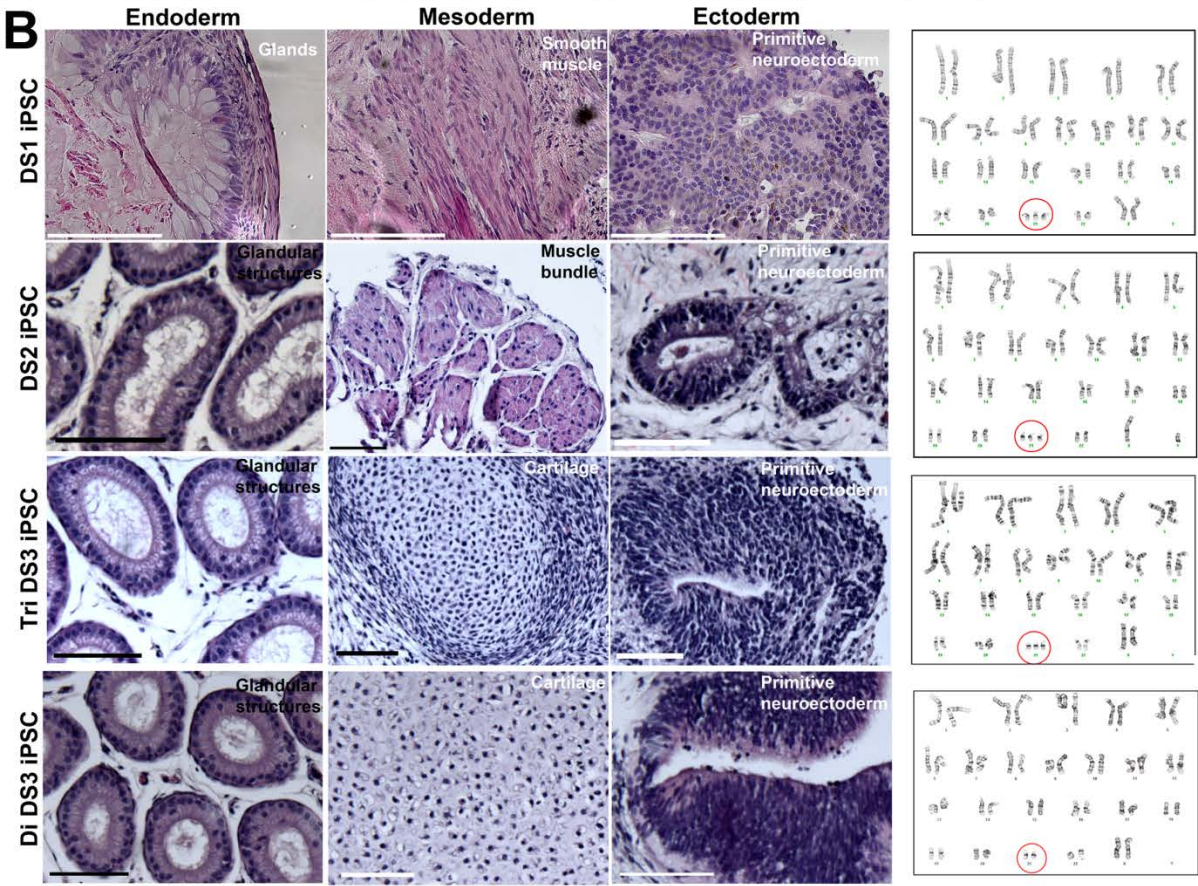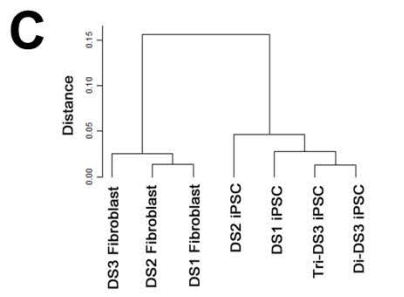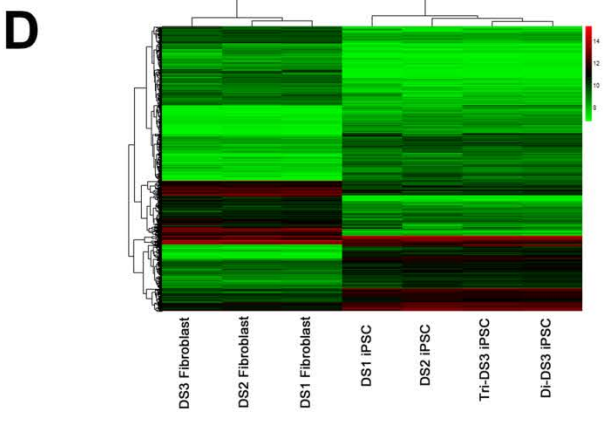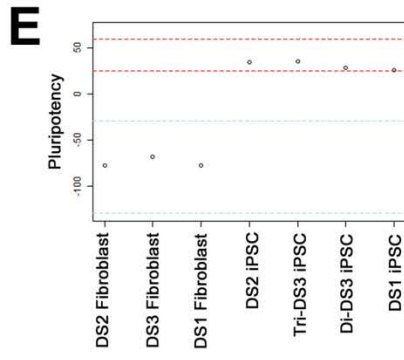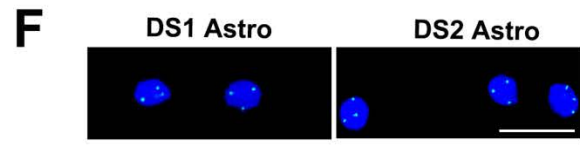

## Supplementary Figure 1. Characterization of DS iPSCs.

(A) Bright-field images showing the morphology of fibroblasts and iPSCs from patient DS1, DS2 and DS3. Scale bars represent 100  $\mu\text{m}$ . (B) Representative images showing teratoma formation and karyotypes of DS iPSCs. Hematoxylin and eosin staining of teratomas derived from DS iPSC lines show tissues representative of three major germ layers: ectoderm, mesoderm and endoderm. Scale bars represent 100  $\mu\text{m}$ . The HSA21 are highlighted in red circles. (C) Dendrogram shows that all three fibroblasts cluster together and all iPSCs cluster together despite one of the iPSC lines Di-DS3 has lost the extra HSA21 during culture. Distance is based on Person correlations. (D) Heatmap of differentially expressed genes ( $\geq 2$  folds,  $p < 0.05$ ) in DS iPSCs and fibroblasts. Red color indicates genes with higher expression and green color indicates genes with lower expression. Distinct gene expression pattern can be seen between fibroblasts and iPSCs. (E) Pluritest performed at [www.PluriTest.org](http://www.PluriTest.org). Illumina microarray data was uploaded to the PluriTest website and pluripotency score of each cell line was calculated. The three fibroblast lines DS1, DS2 and DS3 fibroblasts have negative pluripotency scores (-77.735, -67.937, and -77.698) and fall between the two blue dotted lines, indicating that they are not pluripotent. In contrast, all four DS iPSC lines have positive pluripotency scores (DS1, 25.763; DS2, 35.051; Tri-DS3, 35.585, and Di-DS3 28.565), and are plotted between two red dotted lines, indicating that they are pluripotent. (F) FISH analysis confirms that DS1 and 2 astroglia maintain trisomic HSA21 stably. Scale bar represents 50  $\mu\text{m}$ .

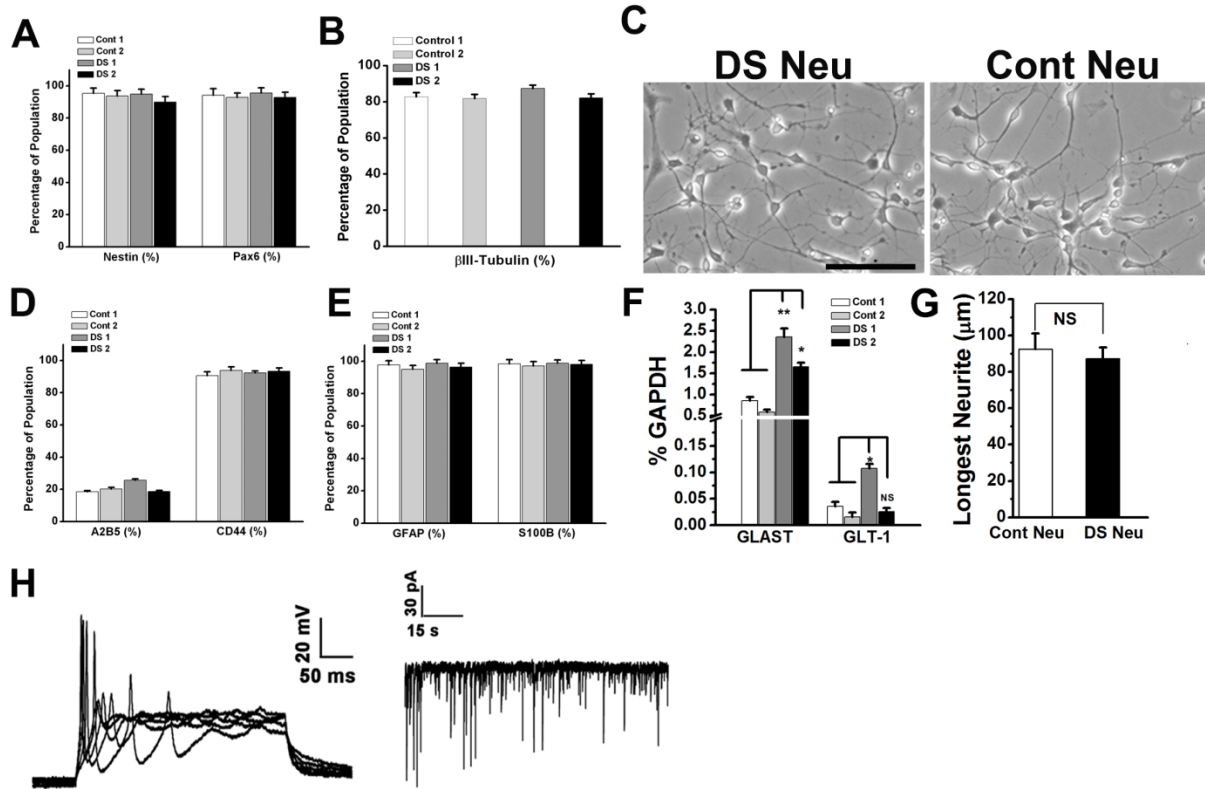

### Supplementary Figure 2. Characterization of DS neurons and astroglia.

(A and B) The induction efficiency of NPCs and  $\beta$ III-tubulin+ neurons from DS iPSC is similar to normal control. (C) Representative bright-field images of control and DS neurons under directed neuronal differentiation condition. Scale bar represents 50  $\mu$ m. (D and E) Both control and DS iPSCs give rise to astroglia at similar efficiency. (F) Representative bright-field images of control astroglia and DS astroglia. Scale bar represents 50  $\mu$ m. (G) Quantitative PCR analysis showing the expression of GLAST and GLT-1 in control and DS astroglia. One-way ANOVA test, \* p < 0.05, \*\* p < 0.01, and NS represents no significant difference. n = 3-4 for each cell line. (H) Quantification of pooled data from control and DS neurons showing the length of the longest neurites of neurons under directed neuronal differentiation conditions (n = 10 from each cell line). Note that control neurons are morphologically undistinguishable from DS neurons. (I) 10-week-old DS neurons fire action potentials and exhibit spontaneous postsynaptic currents.

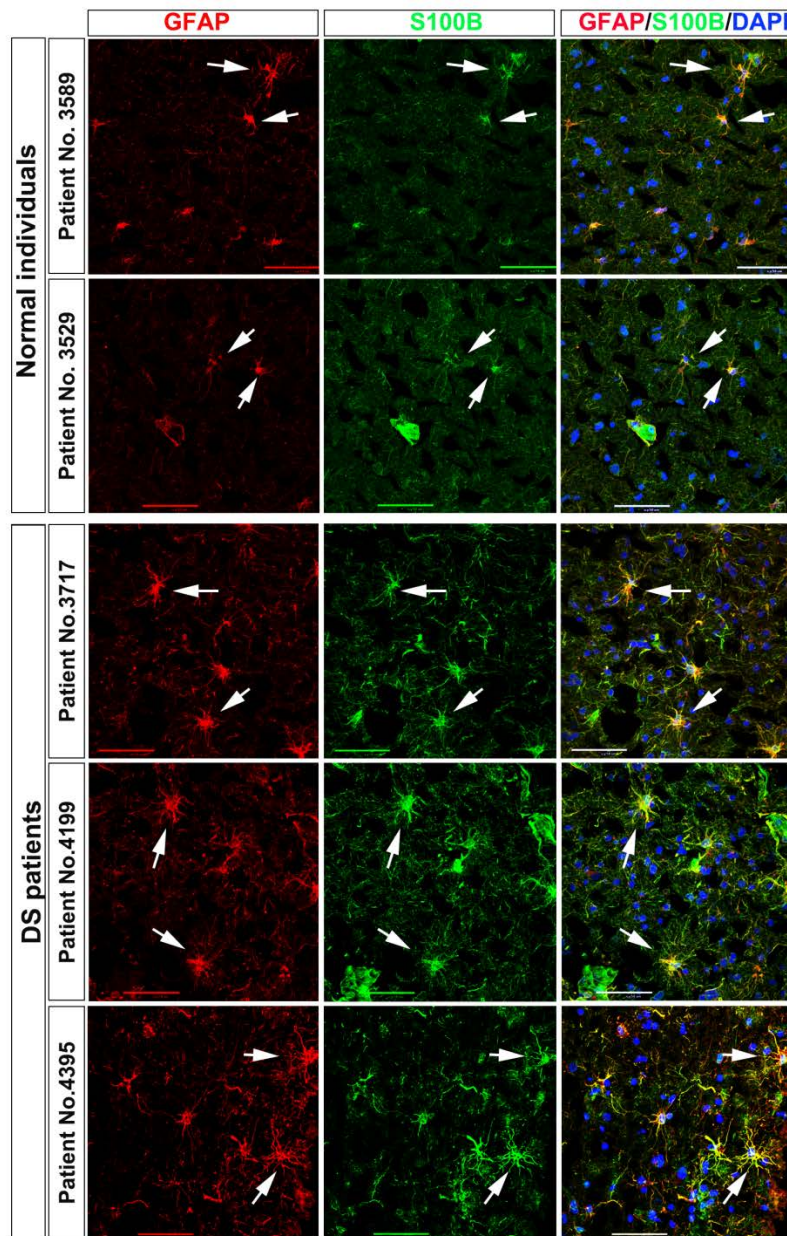

**Supplementary Figure 3. Expression of GFAP and S100B in the DS and normal human brain tissues.**

Representative images showing the expression of GFAP and S100B in the frontal cerebral cortex of the brain tissues from two normal individuals and three DS patients. Note the higher immunoreactivity of GFAP/S100B and an activated morphology of astrocytes in the DS brain tissues, compared to the normal brain tissues. Scale bars represent 50  $\mu\text{m}$ . Arrows indicate the astrocytes positive for GFAP and S100B.

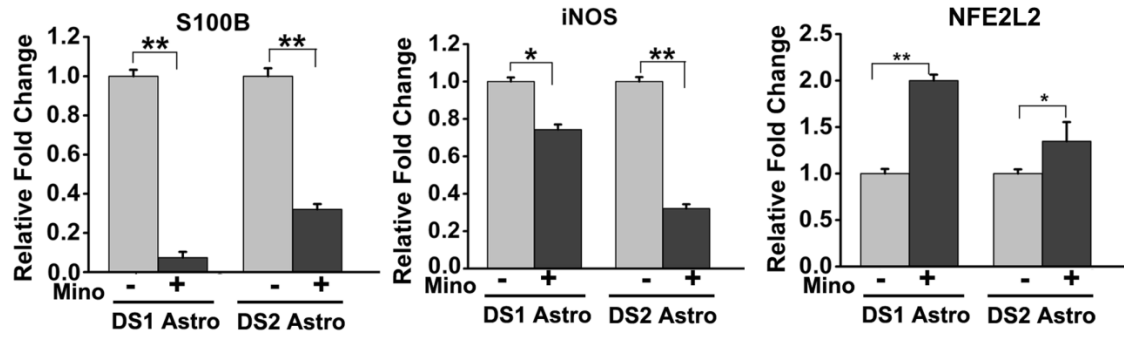

**Supplementary Figure 4. Correction of pathological phenotypes of DS astroglia by minocycline.**

Quantitative PCR analysis showing the expression of S100B, iNOS and NFE2L2 mRNA in DS1 and 2 astroglia with or without treatment of minocycline. Student t test, \* p < 0.05 and \*\* p < 0.01.

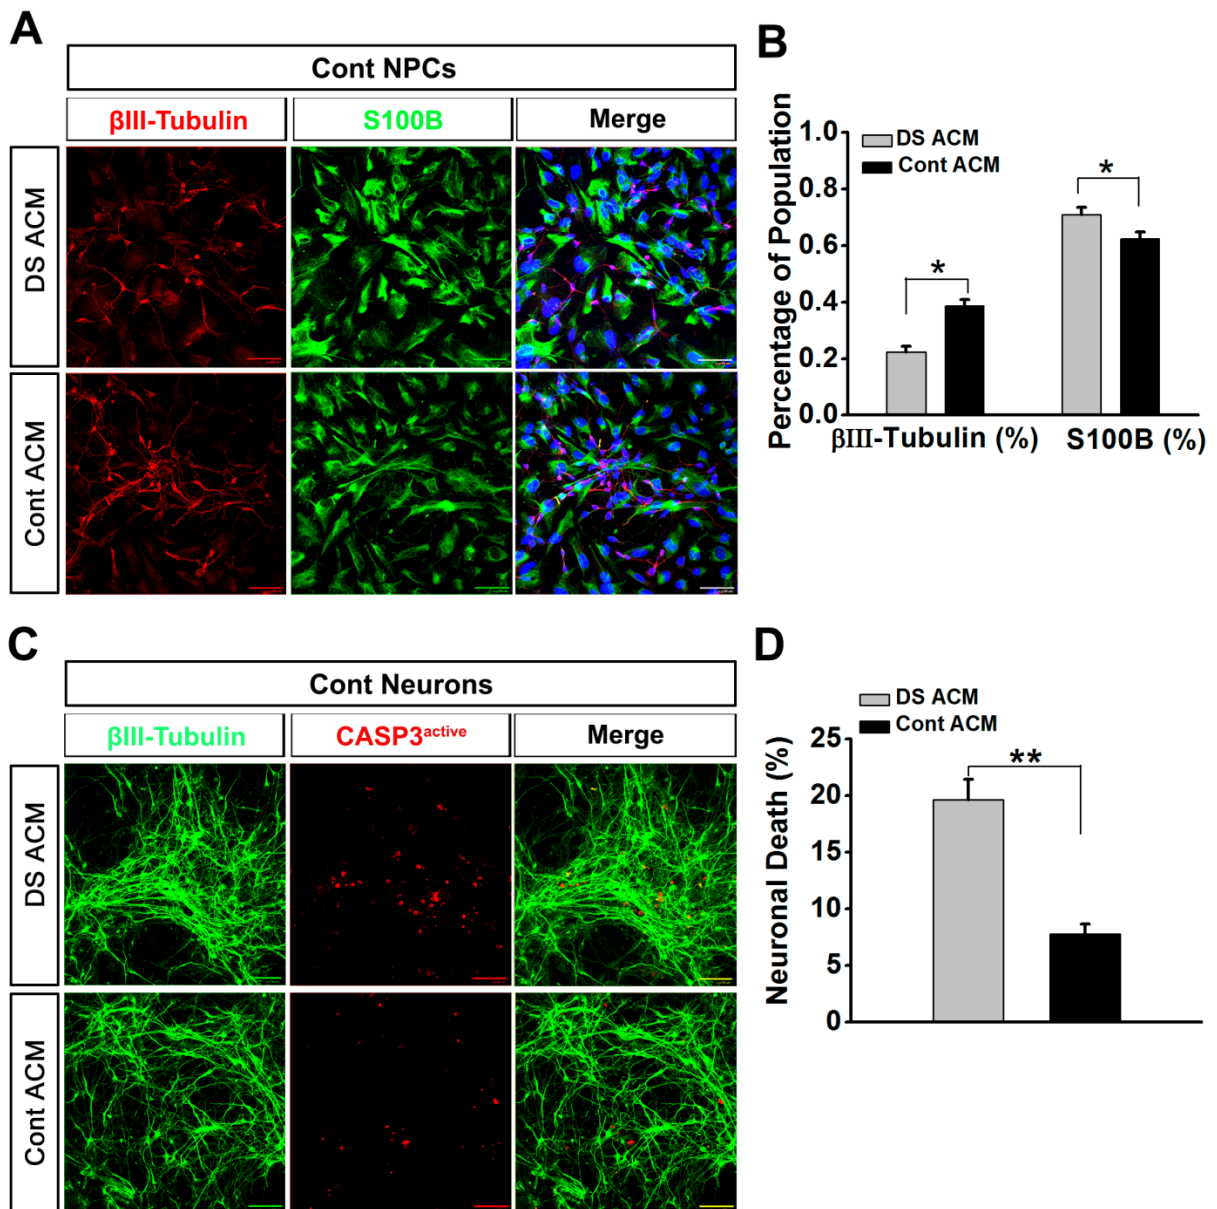

**Supplementary Figure 5. The effects of DS astroglia on the Cont NPC differentiation and Cont neuron survival.**

(A and B) Representatives and quantification of  $\beta$ III-tubulin+ neurons and S100B+ astroglia derived from Cont NPCs under spontaneous differentiation condition in the presence of DS ACM and Cont ACM. Student t test, \*  $p < 0.05$ ,  $n = 3$  for each group. (C and D) Representatives and quantification of  $\beta$ III-tubulin+ and activated caspase3+ between the groups neurons with different treatment. Student t test, \*\*  $p < 0.01$ ,  $n = 3-6$  for each group. Scale bars represent 50  $\mu$ m. Blue, DAPI-stained nuclei.

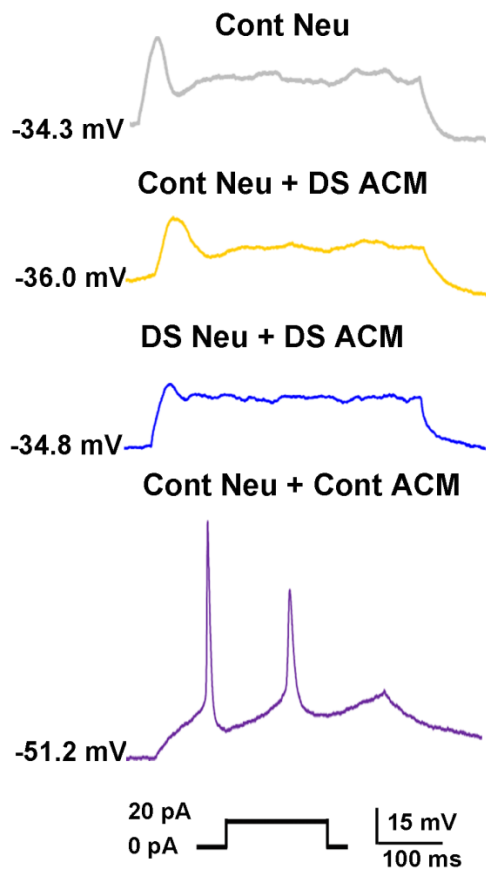

**Supplementary Figure 6. The effects of DS astroglia on the action potential firing of DS neurons.**

Representative tracing showing at RMP, the action potential firing from Cont neurons alone, Cont neurons fed with DS ACM or Cont ACM, and DS neurons fed with DS ACM.

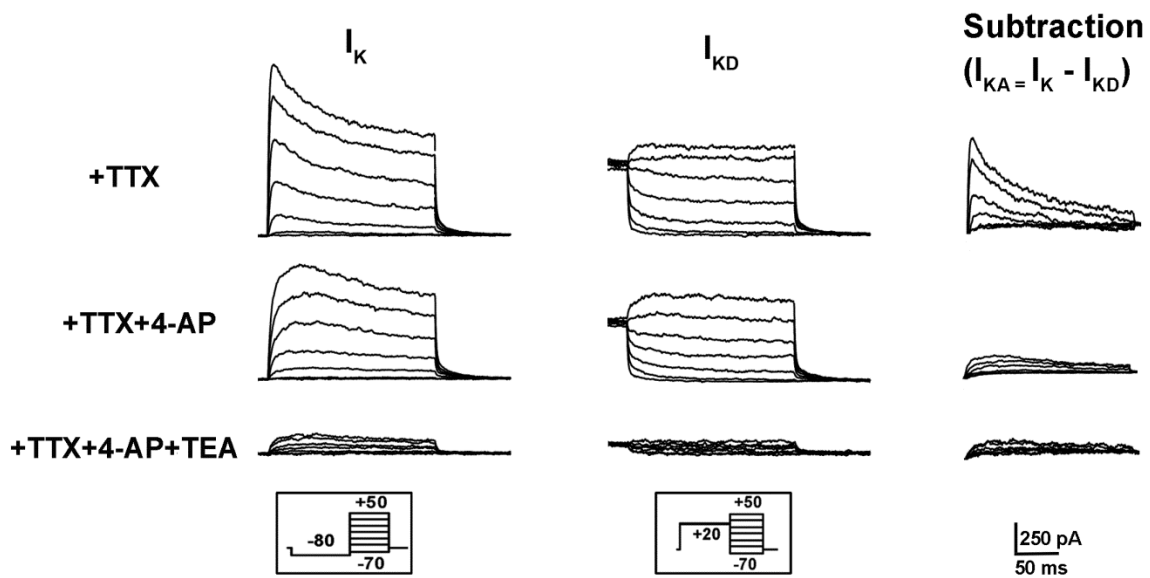

### Supplementary Figure 7. Inhibition of IK by potassium channel blockers 4-AP and TEA.

Upper panels, representative tracings showing that the overall IK, IKD and IKA were recorded from a DS neuron in the presence of TTX. Middle panels, representative tracings from the same neuron showing that the IKA component separated by different pre-pulse stimulations was highly sensitive to potassium channel blocker 4-AP. Lower panels, representative tracings from the same neuron showing that another potassium channel blocker TEA further inhibited the remaining IKD in the presence of 4-AP. The similar result was also observed in other four DS and control neurons.



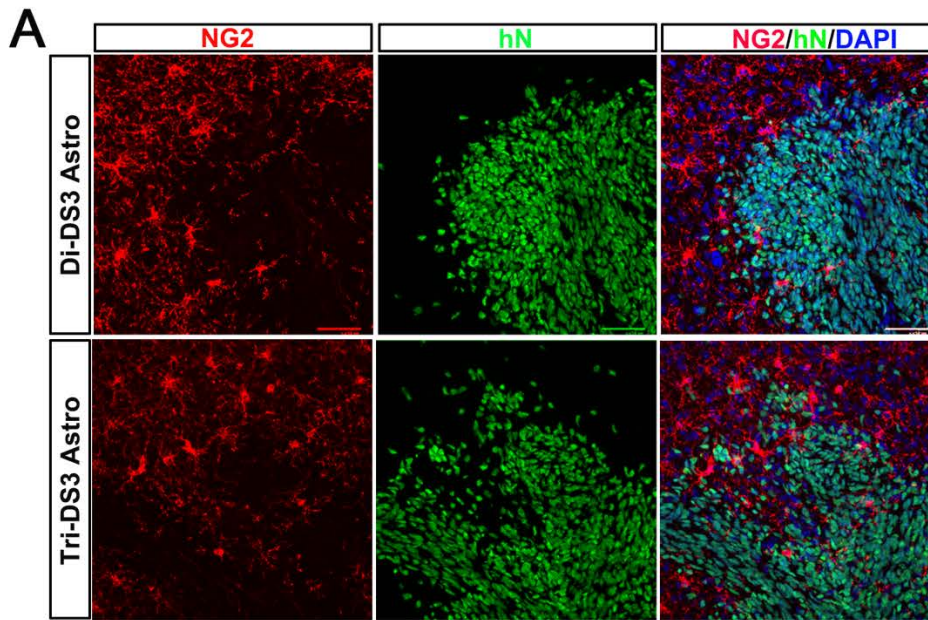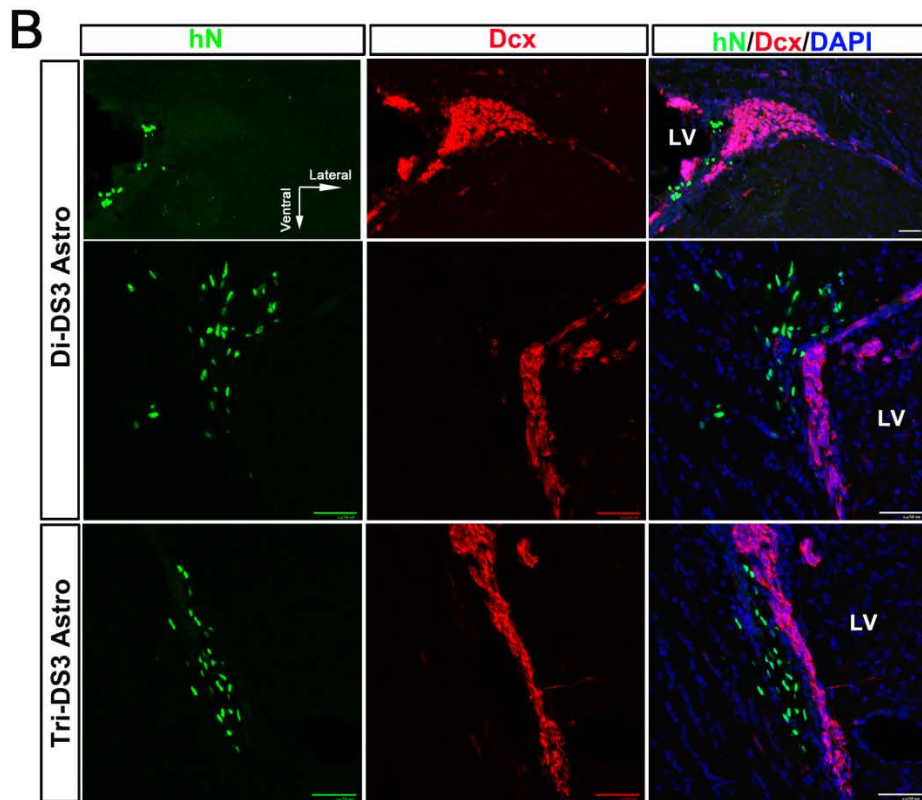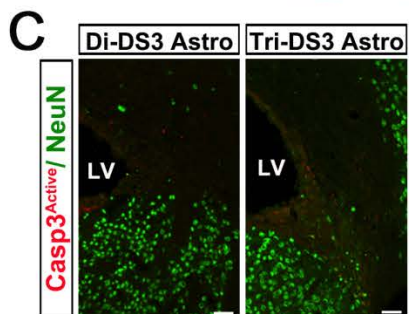

**Supplementary Figure 8. The fate of transplanted astroglia and their effects on endogenous neurons.**

(A and B) Representatives showing that very few of the transplanted astroglia labeled by hN express NG2, a marker for oligodendroglia progenitor cells and none of them express DCX, a marker for immature neurons. (C) Representatives showing that there is no NeuN+/active caspase3+ neurons in the mouse brain received astroglia transplants. Scale bars represent 50  $\mu\text{m}$ .

## Supplementary Table 1.

### Basic information of Down syndrome patient fibroblasts from Coriell

| <b>Patient no.</b> | <b>Coriell's cat. no.</b> | <b>Sex</b> | <b>Age</b> | <b>Race</b> | <b>Cell type</b> | <b>Karyotype</b> | <b>Generated iPSC lines</b> |
|--------------------|---------------------------|------------|------------|-------------|------------------|------------------|-----------------------------|
| <b>DS1</b>         | GM04616                   | Female     | 3 Days     | Caucasian   | Fibroblast       | 47,XX,+21        | DS1 iPSCs                   |
| <b>DS2</b>         | AG08942                   | Male       | 21 Years   | Caucasian   | Fibroblast       | 47,XY,+21        | DS2 iPSCs                   |
| <b>DS3</b>         | AG06872                   | Female     | 1 Year     | Caucasian   | Fibroblast       | 47,XX,+21        | Di- and Tri-DS3 iPSCs       |

**Supplementary Table 2. Differential expression of gene transcripts in control and DS astroglia.**

| <b>Symbol</b>        | <b>RefSeq #</b> | <b>Fold Change*</b> | <b>Definition</b>                                            |
|----------------------|-----------------|---------------------|--------------------------------------------------------------|
| <b>IGF2</b>          | NM_001007139.3  | 83.2801             | insulin-like growth factor 2 (somatomedin A)                 |
| <b>THBS2</b>         | NM_003247.2     | 32.0389             | thrombospondin 2                                             |
| <b>ADAMTS1</b>       | NM_006988.3     | 12.3143             | ADAM metallopeptidase with thrombospondin type 1 motif       |
| <b>THBS1</b>         | NM_003246.2     | 10.0578             | thrombospondin 1                                             |
| <b>CYGB</b>          | NM_134268.3     | 5.8485              | cytoglobin                                                   |
| <b>WNT5B</b>         | NM_032642.2     | 5.239               | wingless-type MMTV integration site family, member 5B        |
| <b>DKK2</b>          | NM_014421.2     | 4.5819              | dickkopf homolog 2                                           |
| <b>BDNF</b>          | NM_001709.3     | 3.8568              | brain-derived neurotrophic factor                            |
| <b>DKK3</b>          | NM_013253.4     | 3.8287              | dickkopf homolog 3                                           |
| <b>HMOX1</b>         | NM_002133.1     | 3.5002              | heme oxygenase (decycling) 1                                 |
| <b>BMP1</b>          | NM_006129.2     | 3.3906              | bone morphogenetic protein 1                                 |
| <b>WNT5A</b>         | NM_003392.3     | 3.3129              | wingless-type MMTV integration site family, member 5A        |
| <b>FGF1</b>          | NM_033136.1     | 2.9393              | fibroblast growth factor 1 (acidic)                          |
| <b>APOE</b>          | NM_000041.2     | 2.0003              | apolipoprotein E                                             |
| <b>GPC1</b>          | NM_002081.1     | 1.949               | glypican 1                                                   |
| <b>SPARC</b>         | NM_003118.2     | 1.912               | secreted protein, acidic, cysteine-rich (osteonectin)        |
| <b>GPC6</b>          | NM_005708.2     | 1.7346              | glypican 6                                                   |
| <b>THBS4</b>         | NM_003248.3     | 1.4058              | thrombospondin 4                                             |
| <b>NFE2L1</b>        | NM_003204.1     | 1.3615              | nuclear factor (erythroid-derived 2)-like 1                  |
| <b>THBS3</b>         | NM_007112.3     | 1.3502              | thrombospondin 3                                             |
| <b>NFE2L2</b>        | NM_006164.2     | 1.2749              | nuclear factor (erythroid-derived 2)-like 2                  |
| <b>GCLM</b>          | NM_002061.2     | 1.271               | glutamate-cysteine ligase, modifier subunit                  |
| <b>WNT2B</b>         | NM_004185.2     | 1.2108              | wingless-type MMTV integration site family, member 2B        |
| <b>BMP8B</b>         | NM_001720.3     | 1.1686              | bone morphogenetic protein 8b                                |
| <b>NLGN2</b>         | NM_020795.2     | 1.1229              | neuroligin 2                                                 |
| <b>FGF18</b>         | NM_003862.1     | -1.2347             | fibroblast growth factor 18                                  |
| <b>PRDX1</b>         | NM_181696.1     | -1.3678             | peroxiredoxin 1                                              |
| <b>PRDX6</b>         | NM_004905.2     | -1.3868             | peroxiredoxin 6                                              |
| <b>GPX4</b>          | NM_002085.2     | -1.411              | glutathione peroxidase 4 (phospholipid hydroperoxidase)      |
| <b>NQO1</b>          | NM_000903.2     | -1.5279             | NAD(P)H dehydrogenase, quinone 1                             |
| <b>NUTF2</b>         | NM_005796.1     | -1.5302             | nuclear transport factor 2                                   |
| <b>GPC4</b>          | NM_001448.2     | -1.5863             | glypican 4                                                   |
| <b>PRDX2</b>         | NM_181738.1     | -1.952              | peroxiredoxin 2, nuclear gene encoding mitochondrial protein |
| <b>FGF11</b>         | NM_004112.2     | -2.0255             | fibroblast growth factor 11                                  |
| <b>GPC2</b>          | NM_152742.1     | -2.0333             | glypican 2                                                   |
| <b>NLGN1</b>         | NM_014932.2     | -2.1891             | neuroligin 1                                                 |
| <b>SPARCL1</b>       | NM_004684.2     | -2.325              | SPARC-like 1 (mast9, hevin)                                  |
| <b>BMP11 (GDF11)</b> | NM_005811.2     | -2.3557             | growth differentiation factor 11                             |
| <b>PRDX3</b>         | NM_006793.2     | -2.593              | peroxiredoxin 3, nuclear gene encoding mitochondrial protein |

---

|              |             |           |                                                       |
|--------------|-------------|-----------|-------------------------------------------------------|
| <b>GPX3</b>  | NM_002084.2 | -2.8727   | glutathione peroxidase 3                              |
| <b>BMP7</b>  | NM_001719.1 | -3.3932   | bone morphogenetic protein 7                          |
| <b>BMP6</b>  | NM_001718.2 | -4.4444   | bone morphogenetic protein 6                          |
| <b>WNT3</b>  | NM_030753.3 | -7.6374   | wingless-type MMTV integration site family, member 3  |
| <b>BMP5</b>  | NM_021073.2 | -10.9409  | bone morphogenetic protein 5                          |
| <b>FGF9</b>  | NM_002010.1 | -37.037   | fibroblast growth factor 9                            |
| <b>GPC3</b>  | NM_004484.2 | -38.1679  | glypican 3                                            |
| <b>NLGN3</b> | NM_018977.2 | -95.2381  | neuroligin 3                                          |
| <b>FGF12</b> | NM_004113.3 | -97.0873  | fibroblast growth factor 12                           |
| <b>FGF13</b> | NM_033642.1 | -588.2353 | fibroblast growth factor 13                           |
| <b>WNT3A</b> | NM_033131.2 | -714.2857 | wingless-type MMTV integration site family, member 3A |

---

**Supplementary Table 3. Summary of pathogenic effects of DS astroglia/DS ACM on DS NPCs and neurons.**

|                                     |                                                                                                                                              |
|-------------------------------------|----------------------------------------------------------------------------------------------------------------------------------------------|
| <b>Reduced neurogenesis</b>         | DS NPCs fed with DS ACM gave rise to fewer neurons and more astrocytes, compared to DS NPCs cultured in control ACM.                         |
| <b>Reduced neurite outgrowth</b>    | Neurons derived from DS NPCs fed with DS ACM showed shorter neurite length than those fed with control ACM.                                  |
| <b>Delayed neuronal maturation</b>  | DS neurons fed with DS ACM showed less robust action potential firings and synaptic activities, compared to DS neurons fed with control ACM. |
| <b>Increased neuronal apoptosis</b> | DS neurons in DS ACM underwent significant apoptosis.                                                                                        |
| <b>Minocycline treatment</b>        | Improved neuronal neurite outgrowth, survival and maturation of DS neurons                                                                   |

**Supplementary Table 4. STR genotyping profile of DS iPSCs and fibroblasts.** STRs of all loci for each iPSC match to its corresponding fibroblast line. All iPSC-Fibroblast pairs have matching STR genotyping for the two HSA21 loci, except in the case of the diploid iPSC Di-DS3, where one of the alleles is not seen, consist with the loss of one copy of HSA21.

| STR Locus  | Chr. Location     | Patient DS1              |     |                        |     | Patient DS2              |     |                        |     | Patient DS3              |      |                            |      |                           |      |
|------------|-------------------|--------------------------|-----|------------------------|-----|--------------------------|-----|------------------------|-----|--------------------------|------|----------------------------|------|---------------------------|------|
|            |                   | Fibroblast<br>(CLG16193) |     | DS1 iPSC<br>(CLG16121) |     | Fibroblast<br>(CLG16118) |     | DS2 iPSC<br>(CLG16119) |     | Fibroblast<br>(CLG16122) |      | Tri-DS3 iPSC<br>(CLG16123) |      | Di-DS3 iPSC<br>(CLG16124) |      |
| Amelogenin | Xp22.1-22.3 and Y | X                        |     | X                      |     | X                        | Y   | X                      | Y   | X                        |      | X                          |      | X                         |      |
| TPOX       | 2p23-2pter        | 8                        | 11  | 8                      | 11  | 9                        |     | 9                      |     | 8                        |      | 8                          |      | 8                         |      |
| D3S1358    | 3p                | 15                       | 17  | 15                     | 17  | 15                       |     | 15                     |     | 15                       | 16   | 15                         | 16   | 15                        | 16   |
| FGA        | 4q28              | 22                       | 25  | 22                     | 25  | 21                       | 24  | 21                     | 24  | 20                       | 21   | 20                         | 21   | 20                        | 21   |
| D5S818     | 5q23.3-32         | 11                       | 12  | 11                     | 12  | 12                       | 13  | 12                     | 13  | 11                       |      | 11                         |      | 11                        |      |
| CSF1PO     | 5q33.3-34         | 10                       | 12  | 10                     | 12  | 11                       |     | 11                     |     | 11                       |      | 11                         |      | 11                        |      |
| D7S820     | 7q11.21-22        | 8                        |     | 8                      |     | 10                       | 11  | 10                     | 11  | 10                       | 11   | 10                         | 11   | 10                        | 11   |
| D8S1179    | 8q                | 8                        | 13  | 8                      | 13  | 12                       | 13  | 12                     | 13  | 12                       | 14   | 12                         | 14   | 12                        | 14   |
| TH01       | 11p15.5           | 7                        | 9.3 | 7                      | 9.3 | 6                        | 9.3 | 6                      | 9.3 | 6                        | 9    | 6                          | 9    | 6                         | 9    |
| vWA        | 12p12-pter        | 17                       | 18  | 17                     | 18  | 17                       | 18  | 17                     | 18  | 17                       | 18   | 17                         | 18   | 17                        | 18   |
| D13S317    | 13q22-q31         | 9                        | 10  | 9                      | 10  | 12                       | 13  | 12                     | 13  | 9                        | 11   | 9                          | 11   | 9                         | 11   |
| Penta E    | 15q               | 7                        | 10  | 7                      | 10  | 11                       | 13  | 11                     | 13  | 11                       | 13   | 11                         | 13   | 11                        | 13   |
| D16S539    | 16q24-qter        | 11                       | 12  | 11                     | 12  | 11                       |     | 11                     |     | 9                        | 12   | 9                          | 12   | 9                         | 12   |
| D18S51     | 18q21.3           | 12                       | 15  | 12                     | 15  | 16                       | 18  | 16                     | 18  | 13                       | 14   | 13                         | 14   | 13                        | 14   |
| Penta D    | 21q               | 9                        | 11  | 9                      | 11  | 9                        | 12  | 9                      | 12  | 9                        | 14   | 9                          | 14   | 9                         | 17   |
| D21S11     | 21q11-21q21       | 28                       | 29  | 28                     | 29  | 28                       | 31  | 28                     | 31  | 30                       | 31.2 | 30                         | 31.2 | 30                        | 31.2 |

## Supplementary Table 5.

### Quantitative PCR primers

| Gene   | Forward sequence                | Reverse sequence           | Length (bp) |
|--------|---------------------------------|----------------------------|-------------|
| GFAP   | AGTCCCTGGAGAGGCAGATGCGC<br>GAGC | ATGTTCTCTTGAGGTGGCCTTCTGAC | 313         |
| NFE2L2 | TGATTGACATACTTTGGAGGC           | TCTTCATCTAGTTGTAAGTGAAGC   | 181         |
| TSP1   | GCTGCACTGAGTGTCAGTGC            | TCAGGAAGTGTGGCATTGG        | 91          |
| TSP2   | GTGCAGGAGCGTCAGATGT             | GGGTTGGATAAACAGCCATC       | 62          |
| GAPDH  | GAGTCCACTGGCGTCTTCAC            | TTCACACCCATGACGAACAT       | 119         |



## Supplementary Table 6.

### Taqman primers

| Gene  | Gene expression assay catalog number |
|-------|--------------------------------------|
| GLAST | Hs00188193_m1                        |
| GLT-1 | Hs01102423_m1                        |
| S100B | Hs00902901_m1                        |
| iNOS  | Hs01126940_gH                        |
| GAPDH | Hs02758991_g1                        |
